# Supplementary material
Source: Springer Nature journal article supplement (https://www.springermedizin.de/resource/supplementary/13643_2014_280_MOESM1_ESM.pdf/9681670)
Supplement: MOESM1 [file 9681670]

MEDLINE Search:

|     |                                                                                                                                                                                   |
|-----|-----------------------------------------------------------------------------------------------------------------------------------------------------------------------------------|
| #1  | (benzidines OR benzidine) OR (biphenyldiamines OR biphenyldiamine) OR (bianilines OR bianiline) OR 2-naphthylamine OR beta-naphthylamine OR 2-aminonaphthalene OR dyestuff*[tiab] |
| #2  | mortality OR incidence OR morbidity OR "cause of death" OR risk OR "adverse effects" OR epidemiology                                                                              |
| #3  | neoplasms OR carcinogen* OR cancer OR tumor OR tumour OR carcinoma                                                                                                                |
| #4  | work[tw] OR works*[tw] OR worka*[tw] OR worke*[tw] OR workg*[tw] OR worki*[tw] OR workl*[tw] OR workp*[tw]                                                                        |
| #5  | industr*[tiab] OR manufactur*[tiab] OR occupation*[tiab] OR employ*[tiab] OR product*[tiab] OR factory*[tiab] OR factories*[tiab]                                                 |
| #6  | "occupational exposure"[MeSH] OR "occupational diseases"[MeSH]                                                                                                                    |
| #7  | #4 OR #5 OR #6                                                                                                                                                                    |
| #8  | #1 AND #2 AND #3 AND #7                                                                                                                                                           |
| #9  | "animals"[MeSH Terms:noexp]                                                                                                                                                       |
| #10 | #8 NOT #9                                                                                                                                                                         |
